# Supplementary material
Source: PubMed Central journal article supplement (PMC2795490)
Supplement: 0809208105_0809208105SI.pdf [file 0809208105_0809208105SI.pdf]

# Supporting Information

Fagegaltier et al. 10.1073/pnas.0809208105

## SI Text

**Suppressor Transgenic Constructs.** B2 and P19 cDNA was amplified by PCR from pBWDi-FHV-B2 (B2 Swiss-Prot P68831 sequence) and pBIN-P19 (1), respectively, using the primers B2-F CACCATGCCAAGCAAAC, B2-R CAGTTTTGCGGGTGG, P19-F 5'-CACCATGGAACGAGC-3' and P19-R CTCGCTTCTTTTTTCG, and cloned into the *p-ENTR-D-TOPO* vector (Invitrogen) to give pENTR-B2 and pENTR-P19, respectively. For pENTR-NLS-P19 construct, the nuclear localization sequence was amplified from the transformer cDNA using the primers tra-F CACCATGAGGCACAGAAGGCATCGCCA and tra/P19-R GCTCGTTCCATTCGTTCACTGCTG on one hand, and P19 was amplified from pENTR-P19 using the primers tra/P19-F CAGCAGTgAACgAATggAACgAgC and P19-R CTCGCTTCTTTTTTCG however. Both PCR products were purified, used in a mix as templates in a second PCR step using the external primers tra-F and P19-R. The tra-NLS-P19 PCR product was then cloned into *p-ENTR-D-TOPO*. pENTR-B2, pENTR-P19 and pENTR-NLS-P19 were recombined into the pUASp vector (2) adapted for the Gateway system (*Drosophila* Gateway Vector collection, Carnegie Institution) to give C-terminal FLAG tagged pPWF-B2, pPWF-P19 and pPWF-NLS-P19 constructs, respectively. The sequences of these constructs were verified by sequencing before establishing transgenic stocks by standard injection procedure. For expression in S2 cells, viral protein genes from *p-ENTR-B2*, pENTR-P19, and pENTR-NLS-P19 plasmids were recombined into the copper inducible pMT-DEST48 Gateway vector (Invitrogen) to produce V5 tagged protein, or into the pAWH destination vector (*Drosophila* Gateway Vector collection, Carnegie Institution) to produce HA tagged protein under the control of the Act5C promoter.

**Genetic Crosses.** To analyze the effect of suppressors on *white* RNAi, we constructed an homozygous *w<sup>1118</sup>*, GMR>IR[w]; GMR>GAL4 stock by genetic recombination and crossing, and crossed it to homozygous UAS>GFP, UAS>B2, UAS>P19 and UAS>NLS-P19 lines. For controls, the same lines were crossed to the homozygous *w<sup>1118</sup>*; GMR>GAL4 stock.

To analyze the effect of suppressors on *EcR* RNAi, we constructed a *w<sup>1118</sup>*; GMR>GAL4, UAS>IR[EcR] / *CyO* stock by genetic recombination and crossed it to the UAS>GFP, UAS>B2, UAS>P19 and UAS>NLS-P19 lines. To analyze the effect of suppressors of bantam silencing, we recombined the *Tubulin*>GFP-ban sensor transgene with the *engrailed*>GAL4 driver on the third chromosome and crossed the resulting homozygous stock to the UAS>B2, UAS>P19, and UAS>NLS-P19 lines

To analyze the effect of mutations on white PEV, homozygous *ln (1)<sup>w<sup>m4h</sup></sup>* (*w<sup>m4</sup>*) females carrying the mutant allele over the *CyO Act5C>GFP* or *TM6B Tb* balancer chromosome were crossed to males carrying the mutant allele in a *w<sup>1118</sup>* background, and effects in male offspring was addressed (see Fig. S7 for the design of genetic tests).

*Sb<sup>V</sup>* variegation was analyzed by crossing *T(2;3)Sb<sup>V</sup>*, *In(3R)Mo*, *Sb<sup>1</sup> sr1/TM3* *Ser* females to heterozygous mutant males over a balancer or homozygous *dcr2<sup>R496X</sup>*, *dcr2<sup>L811fsX</sup>*, or *ago2<sup>414</sup>* mutant males. In the *Stubble-variegator* translocation *Sb<sup>V</sup>*, the *Sb<sup>1</sup>* dominant mutation becomes silenced by pericentric heterochromatin (2R), resulting in composite bristle length. A strong suppressor or enhancer will give nearly all stubble or wild-type bristles, respectively. The length of seven pairs of major dorsal macrochaetes was examined as described in ref. 3 and attributed a wild

type or *Stubble (Sb)* score. At least 30 flies of each sex were examined in a given cross. For viral proteins effects, bristles were scored in the offspring of *T(2;3)Sb<sup>V</sup>*, *In(3R)Mo*, *Sb<sup>1</sup> sr1/TM3* males crossed to (1) *Act5C-GAL4* control driver, (2) *Act5C-GAL4>B2*, (3) *Act5C-GAL4>P19* or (4) *Act5C-GAL4>NLS-P19* females.

**Eye Pigment Determination.** Assays were performed on same aged 3-day-old virgin females. Five heads per genotype were manually collected and homogenized in 50  $\mu$ l of a freshly prepared solution of acidified methanol (0.1% HCl). Pigment was extracted by rocking tubes for 36 h at 4  $^{\circ}$ C. Homogenates were then incubated at 50  $^{\circ}$ C for 5 min, clarified by centrifugation and optical density of each sample was read at 480 nm. Three independent extractions were performed for each genotype, and the mean values of the absorption per extraction were calculated.

**Salivary Gland Immunostaining.** B2, P19 or NLS-P19 homozygous transgenic lines were crossed to the *lio*>GAL4 driver line. Salivary glands from third instar wandering larvae were dissected in PBS, fixed for 30 min in PBST (PBS-0.1% Triton X-100) containing 3.7% formaldehyde, rinsed twice in PBST and blocked for 30 min in PBST, 1% BSA, 10% FBS. Samples were incubated with mouse anti-FLAG M2 antibodies (1:500). We used secondary FITC-coupled anti-mouse antibodies (1:500). Whole salivary glands were mounted in DAPI containing Vectashield (Vector Labs) and analyzed using confocal Leica TCS LPE microscope.

**Immunofluorescence on S2 Cells.** Cells transfected with 2  $\mu$ g of pMT-DEST48, pMT-B2, pMT-P19 or pMT-NLS-P19 plasmid and induced as below were washed once in PBS, gently spun on slides, and immediately fixed for 10 min in 3.6% formaldehyde. The slides were then rinsed three times in PBS, and cells permeabilized for 10 min in 4 $\times$  SSC, 0.1% Triton, 0.1% Tween-20 before blocking in the same buffer containing 5% BSA. Mouse anti-V5 antibody (1:500, Invitrogen) was incubated overnight in blocking buffer, and detected with Cy3-anti-mouse secondary. Slides were mounted in DAPI containing Vectashield and viewed under a fluorescence microscope attached to an Axioplan imaging Apotome apparatus (Zeiss).

**Immunoprecipitation from S2 Cells.** For transient expression, 4  $\mu$ g of pMT-DEST48 control plasmid, pMT-B2-V5, pMT-P19-V5, or pMT-NLSP19 were transfected in S2 cells with Effecten Reagent (Invitrogen) according to the manufacturer's instructions. Two days after transfection, cells were split and cultured for two more days. Each well was then induced with 500  $\mu$ M CuSO<sub>4</sub>, and cells were harvested 20 h after induction. For total RNA analysis, cells were pelleted and RNA extracted with TRIzol Reagent (Invitrogen) according to the manufacturer's instructions, except that RNA washes were performed in 80% ethanol. For immunoprecipitation experiments, cells were harvested, washed twice in PBS, and lysed on ice for 30 min in Lysis buffer (50 mM Tris-HCl pH7.5, 150 mM NaCl, 2.5 mM MgCl<sub>2</sub>, 250 mM sucrose, 0.05% Nonidet P-40, 0.5% Triton X-100, 1 mM DTT, 1X protease inhibitor mixture) with 40U RNase OUT. Supernatant was incubated with mouse anti-V5 antibodies (Invitrogen) and equilibrated Gammabind-Plus resin slurry (GE Healthcare) for 3 h or overnight. Supernatant was collected for analysis, and beads washed 5 times in Lysis Buffer. 25% of the beads were used for protein analysis. The remainder was incubated for 2 h with







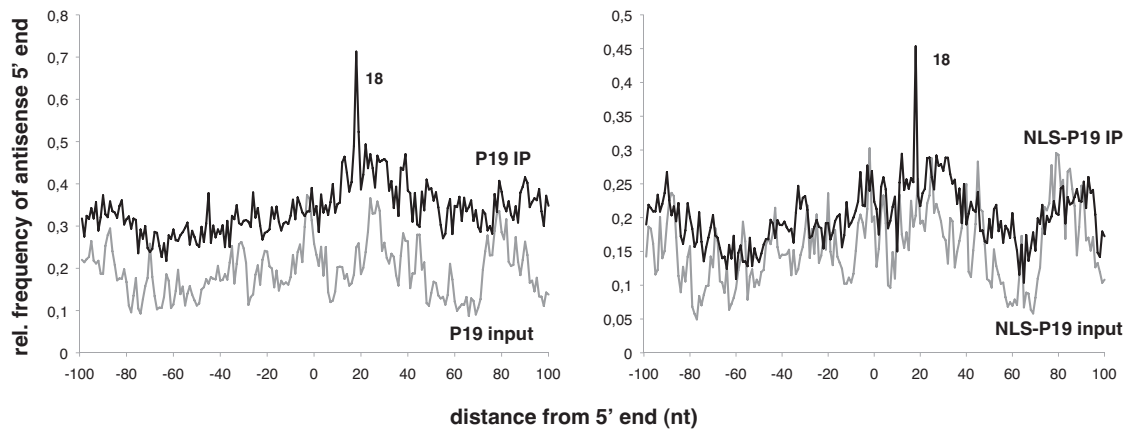

**Fig. S3.** Frequency maps, for the P19 input, P19 IP, NLS-P19 input and NLS IP libraries, of the separation of 297-matching siRNAs mapping to opposite genomic strands. The spike at position 18 indicates the position of maximal probability of finding the 5' end of a complementary siRNA, which corresponds to a 19nt offset (graphs start at 0).

**A**

| element         | S2     | P19 input | NLSP19 input | P19 IP | NLSP19 IP |
|-----------------|--------|-----------|--------------|--------|-----------|
| <b>297</b>      | 18,68% | 26,05%    | 28,10%       | 21,67% | 28,73%    |
| <b>blood</b>    | 17,00% | 16,04%    | 15,60%       | 17,81% | 15,97%    |
| <b>1731</b>     | 12,45% | 19,60%    | 19,74%       | 24,08% | 20,72%    |
| <b>mdg1</b>     | 7,85%  | 9,38%     | 10,75%       | 8,61%  | 7,56%     |
| <b>diver</b>    | 6,93%  | 4,03%     | 3,61%        | 5,42%  | 2,36%     |
| <b>copia</b>    | 4,89%  | 3,98%     | 3,14%        | 3,74%  | 5,85%     |
| <b>Juan</b>     | 4,37%  | 2,34%     | 2,01%        | 2,11%  | 1,51%     |
| <b>jockey</b>   | 3,66%  | 1,97%     | 1,95%        | 1,88%  | 1,30%     |
| <b>mdg3</b>     | 3,62%  | 2,12%     | 1,54%        | 1,72%  | 1,28%     |
| <b>Bel-3S18</b> | 3,60%  | 1,46%     | 1,45%        | 1,27%  | 1,32%     |
| <b>Tirant</b>   | 2,86%  | 1,23%     | 1,32%        | 1,84%  | 1,33%     |
| <b>roo</b>      | 2,21%  | 2,53%     | 1,63%        | 2,23%  | 1,42%     |
| <b>micropia</b> | 2,06%  | 1,09%     | 1,25%        | 1,15%  | 2,06%     |
| <b>17.6</b>     | 1,62%  | 1,72%     | 1,71%        | 1,87%  | 2,45%     |
| <b>Stalker2</b> | 0,56%  | 0,40%     | 0,40%        | 0,41%  | 0,34%     |

**B**

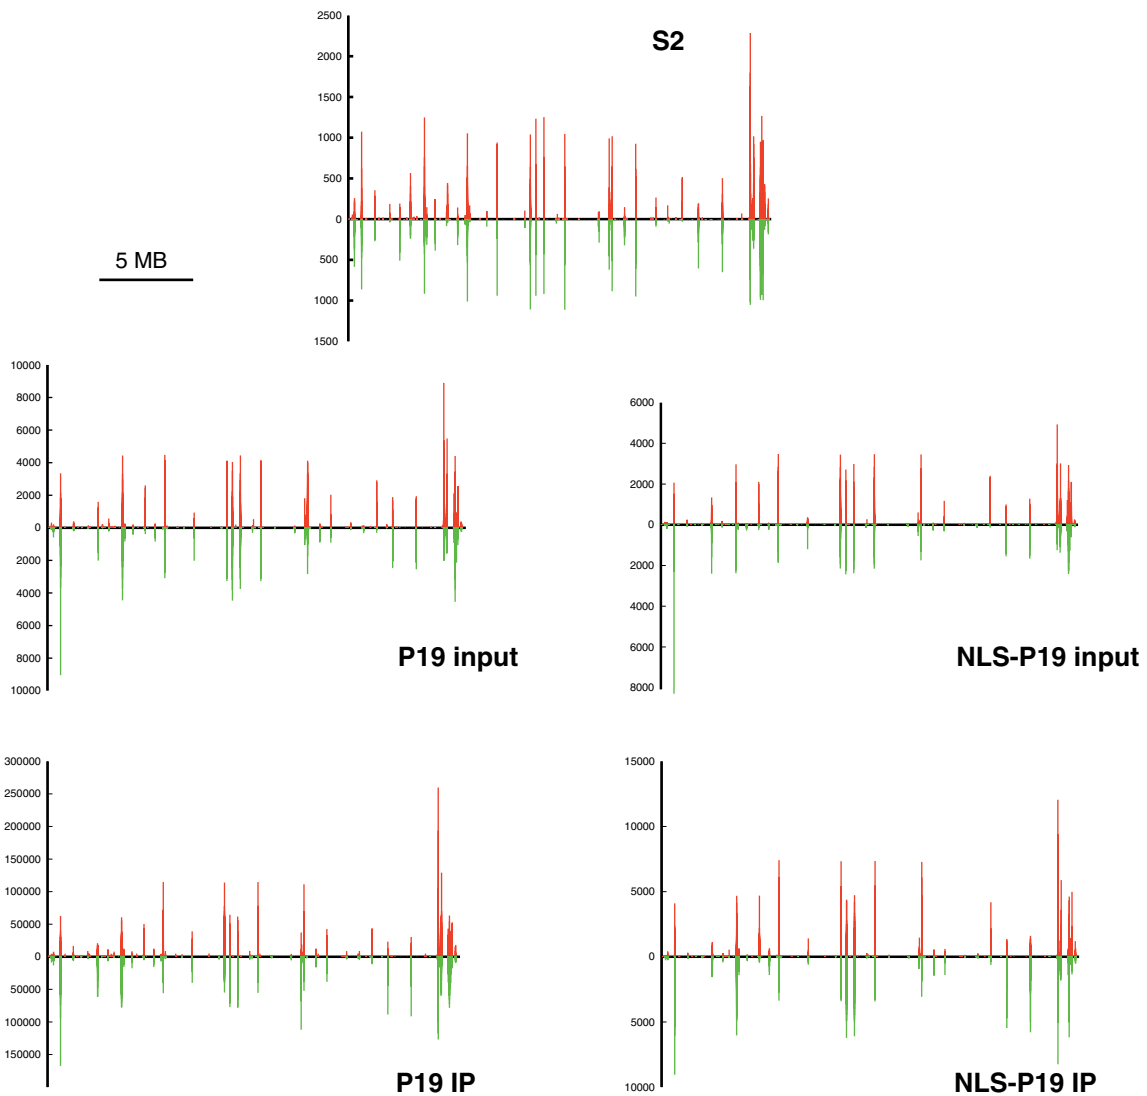

**Fig. S4.** Mapping of TE-derived siRNAs in S2, P19 input, P19 IP, NLS-P19 input and NLS-P19 IP libraries. (A) Heat map indicates the top-15 cloning frequencies for individual transposons in the five libraries. (B) Frequency maps of the TE-matching small RNAs from the five libraries on the chromosome X. The x- and y-axis represent the chromosomal position and the number of reads, respectively. The strand is represented by the color of the bars: plus (red) and minus (green).



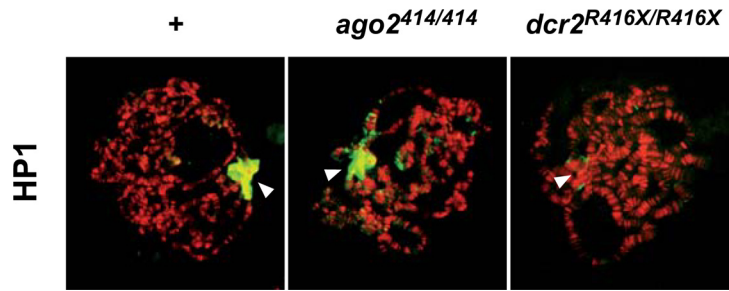

Fig. 56. *ago2* and *dcr2* mutations affect HP1 distribution. White arrowhead points to the chromosome pericentromere. Antibodies: green; DAPI: red.



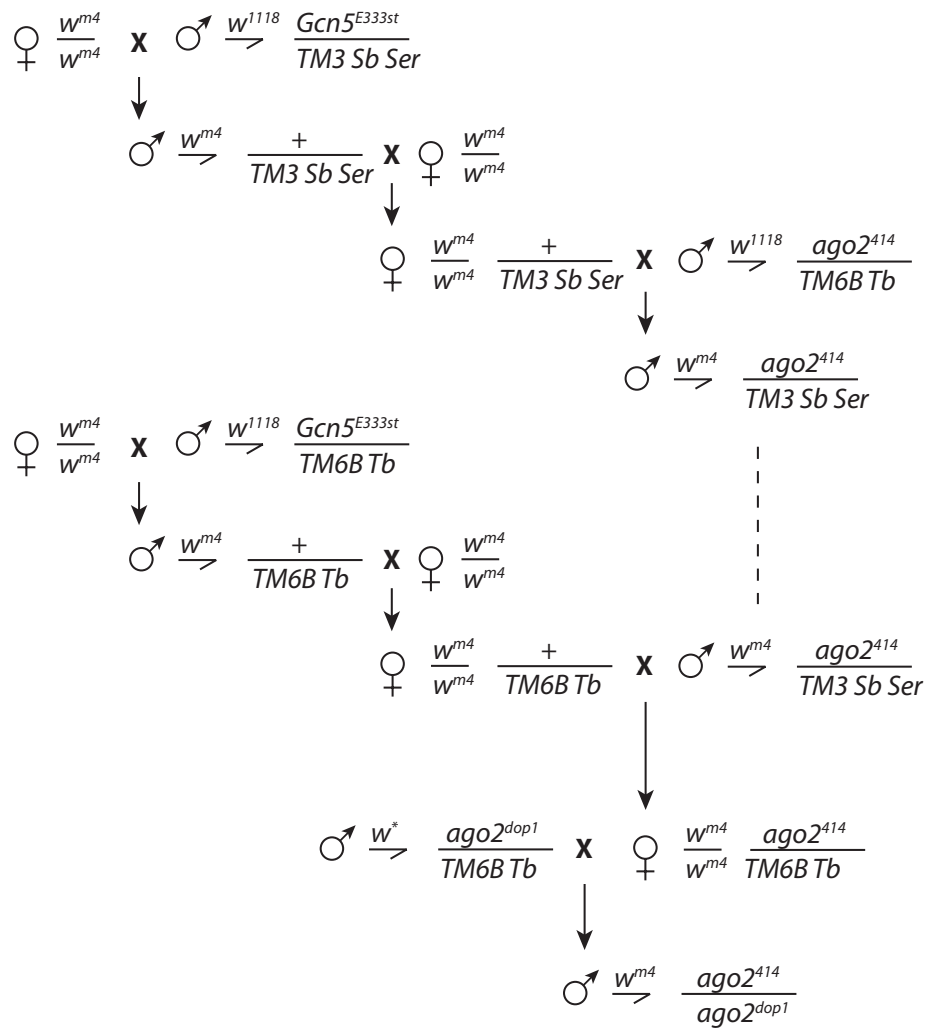

**Fig. S7.** Genetic crosses to generate RNAi mutant males bearing the *I* (1)*w<sup>m4h</sup>* (*w<sup>m4</sup>*) chromosome. Given is the genetic cross scheme to generate the *w<sup>m4</sup>/Y*; *ago2<sup>414</sup>/ago2<sup>dop1</sup>* heteroallelic combination presented in Fig. 5. Similar schemes were used for *dicer2* and *r2d2* mutant alleles, except that second chromosome GFP balancers *CyO* and *CyO* were used instead of the third chromosome balancers *TM3 Sb Ser* and *TM6B Tb*.

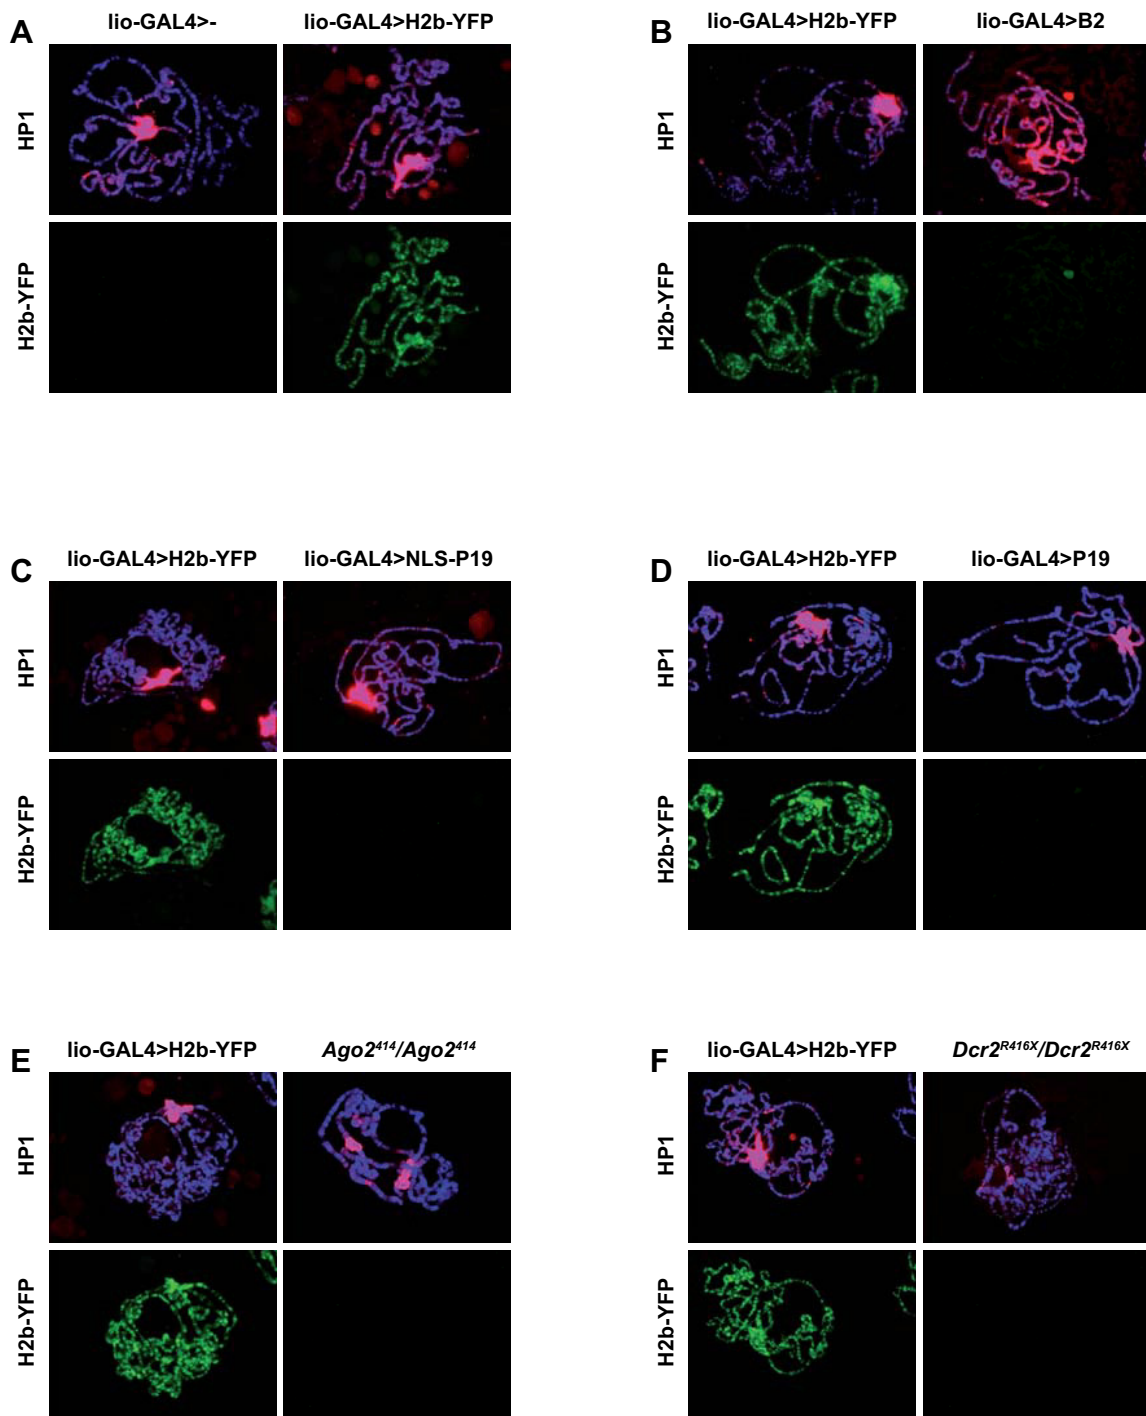

**Fig. 58.** B2, NLS-P19, *ago2* and *dcr2* mutations affect HP1 distribution on polytene chromosomes from third instar salivary glands. (A) Salivary glands from a *lio>GAL4/+* and from a *lio>GAL4/+; UAS>H2b-YFP/+* larvae were squashed on the same slide and stained with DAPI (blue) and anti-HP1 antibody (red). Chromosome sets were genotyped owing to yellow fluorescence of YFP. H2b-YFP expression does not affect HP1 distribution. Control salivary glands from *lio>GAL4/+; UAS>H2b-YFP/+* (Left) and salivary glands from *lio>GAL4/+; UAS>B2/+* (B), *lio-GAL4/+; UAS>P19/+* (C), *lio-GAL4/+; UAS>NLS-P19/+* (D), *ago2<sup>414</sup>/ago2<sup>414</sup>* (E) or *dcr2<sup>R416X</sup>/dcr2<sup>R416X</sup>* (F) larvae (Right) were spread on the same slide. Chromosome sets were stained and genotyped following the same procedure.
